# Supplementary material
Source: PubMed Central journal article supplement (PMC122089)
Supplement: 1471-2164-3-26-s1.pdf [file 1471-2164-3-26-s1.pdf]

cctgttccggaagcgtgggtggcgcctcagccgtggagggtgttatagtaaccaggctgggc 62  
tttgatggcggcgacccccgggactctc **tag**actgtgaatcctgcaggaatgactgaa**tga** 122  
acccttgattcacggacatgccggaggagttcaacatgggcacacacgactgtcacagac 182  
ggcagattc **tga**acctacatcgtgagcgggaagatgtagcctttctacaggacgcatcgag 242  
**atg**caaggcaatacgtgtcatagaatgtcgtaccaccaggacgagggtgtccccggggc 302  
**M Q G N T C H R M S Y H P G R G C P R G** 20  
*M Q G N T C H R M S F H P G R G C P R G*

cgaggaggacacggagccagaccttcagcaccagctttcagacccccaaaacctgcgactt 362  
**R G G H G A R P S A P A F R P Q N L R L** 40  
*R G G H G A R P S A P S F R P Q N L R L*

cttcatccccaacagccgctgcgagcagatcaatatgagcctccgagcgcctccctcttcc 422  
**L H P Q Q P P A Q Y Q Y E P P S A P S S** 60  
*L H P Q Q P P V Q Y Q Y E P P S A P S T*

tcctactcgaactctcaggccccagctttatgccccacggccagactttgtcccttac 482  
**S Y S N S Q A P S F M P P R P D F V P Y** 80  
*T F S N S P A P N F L P P R P D F V P F*

cctccccagcggcgccgtctgcccaggcctctccctccctgcccagtgaggccgct 542  
**P P P A A P S A Q G P L P P C P V R P P** 100  
*P P P M P P S A Q G P L P P C P I R P P*

taccccaaccaccagatgagacaccctttcccggtgcctccctgttttccaccatgccc 602  
**Y P N H Q M R H P F P V P P C F P P M P** 120  
*F P N H Q M R H P F P V P P C F P P M P*

cctccgatgccttgtcccaataaccgcctgcctccggagcacctcccggacaaggcact 662  
**P P M P C P N N P P A S G A P P G Q G T** 140  
*P P M P C P N N P P V P G A P P G Q G T*

ttccccttcattggtgccccctccttccatgccccaccctccgccccgcccgtcatgccg 722  
**F P F M V P P P S M P H P P P P P V M P** 160  
*F P F M M P P P S M P H P P P P P V M P*

cagcaggttaattaccagtacccccctgggtactcgcacagc---ttcccaccgcccggc 779  
**Q Q V N Y Q Y P P G Y S H S - F P P P G** 179  
*Q Q V N Y Q Y P P G Y S H H N F P P P S*

ttcaacagttaccagaacaactccagctctttcccaccagtgctaacagcagcagcact 839  
**F N S Y Q N N S S S F P P S A N S S S T** 199  
*F N S F Q N N P S S F L P S A N N S S S*

cctcattttcgacacctcccaccatactcactcccaaaggctcagaatgagaggcggctcc 899  
**P H F R H L P P Y S L P K A Q N E R R S** 219  
*P H F R H L P P Y P L P K A P S E R R S*

ccagaaaggctcaagcactacgacgaccacagggaccgagatcacagtacggggcgagggc 959  
**P E R L K H Y D D H R H R D H S H G R G** 239  
*P E R L K H Y D D H R H R D H S H G R G*

gagaggcatcggctccctggagcgcagggagcgcggccgcagccctgaaaggagaagacct 1019  
**E R H R S L E R R E R G R S P E R R R P** 259  
*E R H R S L D R R E R G R S P D R R R Q*

gagagccgctaccgctcagactatgatcgggggagaacgccaccgcctcgccaccgcagc 1079  
**E S R Y R S D Y D R G R T P P P R H R S** 279  
*D S R Y R S D Y D R G R T P - S R H R S*

tatgaaaggagcagagagcgggatcgagagagacacaggcaccgggaggcccgcatca 1139  
**Y E R S R E R D R E R H R H R E A R R S** 299  
 Y E R S R E R E R E R H R H R D N R R S

ccgtctctagaaggctcctacaagaaagagtataagagatctggaaggagttacgcttta 1199  
**P S L E R S Y K K E Y K R S G R S Y A L** 319  
 P S L E R S Y K K E Y K R S G R S Y G L

ccagttgctcctgagcccgctgggtgcacaccagagttgcctggggagatgattaaaact 1259  
**P V A P E P A G C T P E L P G E M I K T** 339  
 S V V P E P A G C T P E L P G E I I K N

acagagtcttggggccccgccccggagaatgtgaatcatcgttctccaagcagggagaag 1319  
**T E S W A P P P E N V N H R S P S R E K** 359  
 T D S W A P P L E I V N H R S P S R E K

aagagagctcgttgggaggaggaaaaagacagatggagcgacagccagggctctggcaaa 1379  
**K R A R W E E E E K D R W S D S Q G S G K** 379  
 K R A R W E E E E K D R W S D N Q S S G K

gagaagaactacacgtccatcaaagagaaagaggcagaggaggtgcctccagagaagacg 1439  
**E K N Y T S I K E K E A E E V P P E K T** 399  
 D K N Y T S I K E K E P E E T M P D K N

gaggaggaggaggaagagctccttaagcctgtgtggattcgctgtacacattcggaaagc 1499  
**E E E E E E L L K P V W I R C T H S E S** 419  
 E E E E E E L L K P V W I R C T H S E N

tattactccagtgacccaatggatcaggtgggagactcgactgtcgtagggacaagcagg 1559  
**Y Y S S D P M D Q V G D S T V V G T S R** 439  
 Y Y S S D P M D Q V G D S T V V G T S R

ctccgtgatttgtatgacaaatttgaggaagaattggggaataggcaagagaaggccaaa 1619  
**L R D L Y D K F E E E L G N R Q E K A K** 459  
 L R D L Y D K F E E E L G S R Q E K A K

gctgcccggcctccgtgggagcctccgaagacaaagctggatgaagatttagagagttcc 1679  
**A A R P P W E P P K T K L D E D L E S S** 479  
 A A R P P W E P P K T K L D E D L E S S

agtgagtctgaatgtgagactgacgacgacagcacctgttccagcagctcggactcggag 1739  
**S E S E C E T D D S T C S S S S D S E** 499  
 S E S E C E S D E D S T C S S S S D S E

gtgttcgatgtcattgcagagattaaacgcaaaaaggctcaccctgaccggcttcatgat 1799  
**V F D V I A E I K R K K A H P D R L H D** 519  
 V F D V I A E I K R K K A H P D R L H D

gaactctggtacaacgacccaggccagatgaacgatggaccgctttgcaaatgcagtgca 1859  
**E L W Y N D P G Q M N D G P L C K C S A** 539  
 E L W Y N D P G Q M N D G P L C K C S A

aaagccagacgcacaggaatccggcacagcatttatcccggagaagaggcaatcaagccc 1919  
**K A R R T G I R H S I Y P G E E A I K P** 559  
 K A R R T G I R H S I Y P G E E A I K P

tgccgtccgatgaccaacaacgctggccggcttttccactatcggatcaccgtctccccg 1979  
**C R P M T N N A G R L F H Y R I T V S P** 579  
 C R P M T N N A G R L F H Y R I T V S P

cctaccaacttcttaactgacaggccaacagtcatagaatatgatgaccacgagtatatt 2039  
**P T N F L T D R P T V I E Y D D H E Y I** 599  
*P T N F L T D R P T V I E Y D D H E Y I*

tttgaaggattttctatgtttgcacatgctcctctgaccaatattccactgtgtaaagtg 2099  
**F E G F S M F A H A P L T N I P L C K V** 619  
*F E G F S M F A H A P L T N I P L C K V*

attcgattcaacatagactacacgattcattttatcgaagagatgatgcctgagaatfff 2159  
**I R F N I D Y T I H F I E E M M P E N F** 639  
*I R F N I D Y T I H F I E E M M P E N F*

tgtgtgaaaggacttgaactgttttcattgttcctattcagagatattttggaattatat 2219  
**C V K G L E L F S L F L F R D I L E L Y** 659  
*C V K G L E L F S L F L F R D I L E L Y*

gactggaatcttaaaggctcctttgtttgaagacagccctccctgctgtccgagatttcat 2279  
**D W N L K G P L F E D S P P C C P R F H** 679  
*D W N L K G P L F E D S P P C C P R F H*

ttcatgccacgttttgtaagatttcttcagatggaggcaaagaagtgttatccatgcac 2339  
**F M P R F V R F L P D G G K E V L S M H** 699  
*F M P R F V R F L P D G G K E V L S M H*

cagatccttctctacctgctgcgctgcagcaaggctctggtgcccaggaggagattgcc 2399  
**Q I L L Y L L R C S K A L V P E E E I A** 719  
*Q I L L Y L L R C S K A L V P E E E I A*

aacatgctccagtgaggagctcgagtggcagaaaatacgcagaggagtgcaaaggcatg 2459  
**N M L Q W E E L E W Q K Y A E E C K G M** 739  
*N M L Q W E E L E W Q K Y A E E C K G M*

atcgttaccaaccctgggacgaaaccgagctctgtccgcattgatcagctggatcgtgaa 2519  
**I V T N P G T K P S S V R I D Q L D R E** 759  
*I V T N P G T K P S S V R I D Q L D R E*

cagttcaacccccgaagtgatcactttcccgattatcgttcactttgggatccgccccgca 2579  
**Q F N P E V I T F P I I V H F G I R P A** 779  
*Q F N P D V I T F P I I V H F G I R P A*

cagttgagttatgcaggagaccacagtatcagaaattatggaaaagctatgtgaaactt 2639  
**Q L S Y A G D P Q Y Q K L W K S Y V K L** 799  
*Q L S Y A G D P Q Y Q K L W K S Y V K L*

cgccacctcctagcaaacagtcctcaaaagtcaaacaaactgacaagcagaagctggctcag 2699  
**R H L L A N S P K V K Q T D K Q K L A Q** 819  
*R H L L A N S P K V K Q T D K Q K L A Q*

agggaggaagcgcctccagaaaaatacggcagaagaacacgatgccccgagaagtcccgctg 2759  
**R E E A L Q K I R Q K N T M R R E V T V** 839  
*R E E A L Q K I R Q K N T M R R E V T V*

gagctgagtagccaaggattctggaaaactggcattcgttctgatgtctgtcagcatgca 2819  
**E L S S Q G F W K T G I R S D V C Q H A** 859  
*E L S S Q G F W K T G I R S D V C Q H A*

atgatgctgctgttctgaccatcacatccggtaccatcaatgcttaatgcacctggac 2879  
**M M L P V L T H H I R Y H Q C L M H L D** 879  
*M M L P V L T H H I R Y H Q C L M H L D*

aagttgataggatataactttccaagaccggttgctgctccagcttgccatgactcatccg 2939  
**K L I G Y T F Q D R C L L Q L A M T H P 899**  
K L I G Y T F Q D R C L L Q L A M T H P

agtcaccatttaaattttggaatgaatcctgaccatgccaggaattctttgtctaactgt 2999  
**S H H L N F G M N P D H A R N S L S N C 919**  
S H H L N F G M N P D H A R N S L S N C

ggaattcgacaacccaaatggagacagaaaagttcatcacatgcacatgcggaaaaaa 3059  
**G I R Q P K Y G D R K V H H M H M R K K 939**  
G I R Q P K Y G D R K V H H M H M R K K

ggaattaataccctaataaataatcatgtcacgccttgcccaagatgatccaactccttca 3119  
**G I N T L I N I M S R L G Q D D P T P S 959**  
G I N T L I N I M S R L G Q D D P T P S

aggattaatcacaatgaaagggttgagttcctgggggatgctggttgagtttctgacc 3179  
**R I N H N E R L E F L G D A V V E F L T 979**  
R I N H N E R L E F L G D A V V E F L T

agtggtccacctgtactacctgtttcctagcttgagggaagggggcttgccgacctatcgg 3239  
**S V H L Y Y L F P S L E E G G L A T Y R 999**  
S V H L Y Y L F P S L E E G G L A T Y R

accgccattggttcagaatcagcacctcgccatgcttgcaaagaaacttgaactggatcga 3299  
**T A I V Q N Q H L A M L A K K L E L D R 1019**  
T A I V Q N Q H L A M L A K K L E L D P

tttatgctgtatgcccatgggcccacactatgtagagaatcagatctccgccatgcgatg 3359  
**F M L Y A H G P D L C R E S D L R H A M 1039**  
F M L Y A H G P D L C R E S D L R H A M

gccaatggttttgaagccttgataggagctgtttacttgagggggagcctagaggaagcc 3419  
**A N C F E A L I G A V Y L E G S L E E A 1059**  
A N C F E A L I G A V Y L E G S L E E A

aaacagttatgttgacgcttactctttaatgatccggaccttcgagaagtctggctcaat 3479  
**K Q L F G R L L F N D P D L R E V W L N 1079**  
K Q L F G R L L F N D P D L R E V W L N

tatcctctccaccactccaactacaagagccaaatacggatcggcaacttattgaaact 3539  
**Y P L H P L Q L Q E P N T D R Q L I E T 1099**  
Y P L H P L Q L Q E P N T D R Q L I E T

tccccagttctacagaaacttacggagtttgaagaagcgattggagtgatcttcactcac 3599  
**S P V L Q K L T E F E E A I G V I F T H 1119**  
S P V L Q K L T E F E E A I G V I F T H

gtccggcttctggcgagggcggttcacactgagaaccgtgggctttaaccacctgacccta 3659  
**V R L L A R A F T L R T V G F N H L T L 1139**  
V R L L A R A F T L R T V G F N H L T L

ggccacaatcagaggatggaatcttggggcgactccataatgcagctggtggccacagag 3719  
**G H N Q R M E F L G D S I M Q L V A T E 1159**  
G H N Q R M E F L G D S I M Q L V A T E

tacttggtcattcatttcccggaccatcacgaaggacacttgacgttggttacgaagttcc 3779  
**Y L F I H F P D H H E G H L T L L R S S 1179**  
Y L F I H F P D H H E G H L T L L R S S

ttagtgaacaacagaacgcaagccaaggtagcagaggaactgggcatgcaggagtatgcc 3839  
**L V N N R T Q A K V A E E L G M Q E Y A 1199**  
 L V N N R T Q A K V A E E L G M Q E Y A

atcaccaacgacaaaaaccaagaggcccgcttgcccttaagaaccaagactttggcagacctt 3899  
**I T N D K T K R P V A L R T K T L A D L 1219**  
 I T N D K T K R P V A L R T K T L A D L

ttggaatcatttatcgcagcgtgtacatcgacaaggacctggaatatgtccacactttc 3959  
**L E S F I A A L Y I D K D L E Y V H T F 1239**  
 L E S F I A A L Y T D K D L E Y V H T F

atgaacgtctgcttctttccccggctgaaggagttcattctgaatcaggattggaacgac 4019  
**M N V C F F P R L K E F I L N Q D W N D 1259**  
 M N V C F F P R L K E F I L N Q D W N D

cccaagtcgcagctgcagcagtggtgcctgaccctgaggacagaagggaaagagcctgac 4079  
**P K S Q L Q Q C C L T L R T E G K E P D 1279**  
 P K S Q L Q Q C C L T L R T E G K E P D

atccccttatacaagactctgcagacagtgggggccatcccatgctagaacctacactgtg 4139  
**I P L Y K T L Q T V G P S H A R T Y T V 1299**  
 I P L Y K T L Q T V G P S H A R T Y T V

gctgtttatttcaagggagaaaggataggctgtgggaaaggaccaagcattcagcagggc 4199  
**A V Y F K G E R I G C G K G P S I Q Q A 1319**  
 A V Y F K G E R I G C G K G P S I Q Q A

gagatgggagcagcaatggatgcactggagaaatataactttccccagatggcccatcag 4259  
**E M G A A M D A L E K Y N F P Q M A H Q 1339**  
 E M G A A M D A L E K Y N F P Q M A H Q

aagcggttcattgagcggaaatacagacaagagttaaaggaaatgaggtgggaaagagag 4319  
**K R F I E R K Y R Q E L K E M R W E R E 1359**  
 K R F I E R K Y R Q E L K E M R W E R E

catcaggagagagagccggaggaggctgaagacatcaagaag**taa**acgagggcaggagtg 4379  
**H Q E R E P E E A E D I K K - 1373**  
 H Q E R E P D E T E D I K K -

gcggagcattgcctttctaagaactgtgactgtggcccatcgagacctagcctggttttc 4439  
 ccttagacaatgaatgaagtgtgcccattga**ataaaa**actcaaaccac 4487
